# Supplementary material for: Sotrovimab in Hospitalized Patients with SARS-CoV-2 Omicron Variant Infection: a Propensity Score-Matched Retrospective Cohort Study
Source: PubMed Central journal article supplement (PMC9927465; doi:10.1128/spectrum.04103-22), 2022-12-08
Supplement: spectrum.04103-22-s0001.pdf [file spectrum.04103-22-s0001.pdf]

**Supplemental Table 1.** Patients treated with sotrovimab in the regular ward and propensity-matched control group

|                                        |                   | <b>Control group</b> | <b>Treatment group</b> | <b>P</b> |
|----------------------------------------|-------------------|----------------------|------------------------|----------|
| Sex                                    | female            | 124 (34.4)           | 20 (33.3)              | 0,983    |
|                                        | male              | 236 (65.6)           | 40 (66.7)              |          |
| Age                                    | Mean (SD)         | 51.2 (22.1)          | 51.0 (21.3)            | 0,945    |
| Vaccination status                     | ≥ 2 vaccine doses | 181 (50.3)           | 24 (40.0)              | 0,316    |
|                                        | < 2 vaccine doses | 75 (20.8)            | 14 (23.3)              |          |
|                                        | Unknown           | 104 (28.9)           | 22 (36.7)              |          |
| Dexamethason treatment                 | Yes               | 318 (88.3)           | 50 (83.3)              | 0,38     |
|                                        | No                | 42 (11.7)            | 10 (16.7)              |          |
| Charlson Comorbidity Index             | Mean (SD)         | 3.2 (3.2)            | 3.3 (2.8)              | 0,88     |
| Coronary heart disease                 | Yes               | 299 (83.1)           | 48 (80.0)              | 0,693    |
|                                        | No                | 61 (16.9)            | 12 (20.0)              |          |
| Chronic heart insufficiency            | Yes               | 321 (89.2)           | 52 (86.7)              | 0,728    |
|                                        | No                | 39 (10.8)            | 8 (13.3)               |          |
| Chronic pulmonary disease              | Yes               | 320 (88.9)           | 52 (86.7)              | 0,778    |
|                                        | No                | 40 (11.1)            | 8 (13.3)               |          |
| Diabetes mellitus without organ damage | Yes               | 325 (90.3)           | 57 (95.0)              | 0,349    |
|                                        | No                | 35 (9.7)             | 3 (5.0)                |          |
| Diabetes mellitus with organ damage    | Yes               | 349 (96.9)           | 58 (96.7)              | 1        |
|                                        | No                | 11 (3.1)             | 2 (3.3)                |          |
| Chronic kidney disease                 | Yes               | 308 (85.6)           | 47 (78.3)              | 0,215    |
|                                        | No                | 52 (14.4)            | 13 (21.7)              |          |
| Chemotherapy                           | Yes               | 327 (90.8)           | 49 (81.7)              | 0,055    |
|                                        | No                | 33 (9.2)             | 11 (18.3)              |          |
| Immunosuppressive therapy              | Yes               | 278 (77.2)           | 37 (61.7)              | 0,016    |
|                                        | No                | 82 (22.8)            | 23 (38.3)              |          |

**Supplemental Table 2.** Patients treated with remdesivir and sotrovimab in the regular ward and propensity-matched control group

|                                        |                   | <b>Control group</b> | <b>Treatment group</b> | <b>P</b> |
|----------------------------------------|-------------------|----------------------|------------------------|----------|
| Sex                                    | female            | 77 (58.3)            | 12 (54.5)              | 0,92     |
|                                        | male              | 55 (41.7)            | 10 (45.5)              |          |
| Age                                    | Mean (SD)         | 59.1 (17.3)          | 58.9 (16.4)            | 0,961    |
| Vaccination status                     | ≥ 2 vaccine doses | 99 (75.0)            | 13 (59.1)              | 0,154    |
|                                        | < 2 vaccine doses | 24 (18.2)            | 5 (22.7)               |          |
|                                        | Unknown           | 9 (6.8)              | 4 (18.2)               |          |
| Dexamethason treatment                 | Yes               | 117 (88.6)           | 17 (77.3)              | 0,26     |
|                                        | No                | 15 (11.4)            | 5 (22.7)               |          |
| Charlson Comorbidity Index             | Mean (SD)         | 3.8 (3.0)            | 4.1 (3.1)              | 0,705    |
| Coronary heart disease                 | Yes               | 109 (82.6)           | 19 (86.4)              | 0,895    |
|                                        | No                | 23 (17.4)            | 3 (13.6)               |          |
| Chronic heart insufficiency            | Yes               | 120 (90.9)           | 20 (90.9)              | 1        |
|                                        | No                | 12 (9.1)             | 2 (9.1)                |          |
| Chronic pulmonary disease              | Yes               | 113 (85.6)           | 20 (90.9)              | 0,737    |
|                                        | No                | 19 (14.4)            | 2 (9.1)                |          |
| Diabetes mellitus without organ damage | Yes               | 116 (87.9)           | 20 (90.9)              | 0,959    |
|                                        | No                | 16 (12.1)            | 2 (9.1)                |          |
| Diabetes mellitus with organ damage    | Yes               | 128 (97.0)           | 21 (95.5)              | 1        |
|                                        | No                | 4 (3.0)              | 1 (4.5)                |          |
| Chronic kidney disease                 | Yes               | 106 (80.3)           | 20 (90.9)              | 0,37     |
|                                        | No                | 26 (19.7)            | 2 (9.1)                |          |
| Chemotherapy                           | Yes               | 118 (89.4)           | 16 (72.7)              | 0,07     |
|                                        | No                | 14 (10.6)            | 6 (27.3)               |          |
| Immunosuppressive therapy              | Yes               | 103 (78.0)           | 17 (77.3)              | 1        |
|                                        | No                | 29 (22.0)            | 5 (22.7)               |          |

**Supplemental Table 3.** Patients treated with sotrovimab in the intensive care unit and propensity-matched control group

|                                        |           | <b>Control group</b> | <b>Treatment group</b> | <b>P</b> |
|----------------------------------------|-----------|----------------------|------------------------|----------|
| Sex                                    | female    | 33 (37.9)            | 37 (42.5)              | 0,643    |
|                                        | male      | 54 (62.1)            | 50 (57.5)              |          |
| Age                                    | Mean (SD) | 64.4 (14.3)          | 63.9 (22.2)            | 0,849    |
| Vaccination status                     | Full      | 65 (74.7)            | 59 (67.8)              | 0,059    |
|                                        | Not full  | 14 (16.1)            | 25 (28.7)              |          |
|                                        | Unknown   | 8 (9.2)              | 3 (3.4)                |          |
| Dexamethason treatment                 | Yes       | 32 (36.8)            | 20 (23.0)              | 0,068    |
|                                        | No        | 55 (63.2)            | 67 (77.0)              |          |
| Charlson Comorbidity Index             | Mean (SD) | 5.5 (3.2)            | 5.9 (3.9)              | 0,394    |
| Coronary heart disease                 | Yes       | 63 (72.4)            | 66 (75.9)              | 0,729    |
|                                        | No        | 24 (27.6)            | 21 (24.1)              |          |
| Chronic heart insufficiency            | Yes       | 74 (85.1)            | 59 (67.8)              | 0,012    |
|                                        | No        | 13 (14.9)            | 28 (32.2)              |          |
| Chronic pulmonary disease              | Yes       | 66 (75.9)            | 70 (80.5)              | 0,582    |
|                                        | No        | 21 (24.1)            | 17 (19.5)              |          |
| Diabetes mellitus without organ damage | Yes       | 79 (90.8)            | 73 (83.9)              | 0,254    |
|                                        | No        | 8 (9.2)              | 14 (16.1)              |          |
| Diabetes mellitus with organ damage    | Yes       | 77 (88.5)            | 81 (93.1)              | 0,431    |
|                                        | No        | 10 (11.5)            | 6 (6.9)                |          |
| Chronic kidney disease                 | Yes       | 63 (72.4)            | 63 (72.4)              | 1        |
|                                        | No        | 24 (27.6)            | 24 (27.6)              |          |
| Chemotherapy                           | Yes       | 87 (100.0)           | 67 (77.0)              | <0.001   |
|                                        | No        | 0 (0.0)              | 20 (23.0)              |          |
| Immunosuppressive therapy              | Yes       | 61 (70.1)            | 50 (57.5)              | 0,115    |
|                                        | No        | 26 (29.9)            | 37 (42.5)              |          |

**Supplemental Table 4.** Patients treated with remdesivir and sotrovimab in the intensive care unit and propensity-matched control group

|                                        |                   | <b>Control group</b> | <b>Treatment group</b> | <b>P</b> |
|----------------------------------------|-------------------|----------------------|------------------------|----------|
| Sex                                    | female            | 32 (33.3)            | 5 (31.2)               | 1        |
|                                        | male              | 64 (66.7)            | 11 (68.8)              |          |
| Age                                    | Mean (SD)         | 58.0 (19.6)          | 60.8 (16.5)            | 0,594    |
| Vaccination status                     | ≥ 2 vaccine doses | 78 (81.2)            | 14 (87.5)              | 0,798    |
|                                        | < 2 vaccine doses | 17 (17.7)            | 2 (12.5)               |          |
|                                        | Unknown           | 1 (1.0)              |                        |          |
| Dexamethason treatment                 | Yes               | 21 (21.9)            | 2 (12.5)               | 0,599    |
|                                        | No                | 75 (78.1)            | 14 (87.5)              |          |
| Charlson Comorbidity Index             | Mean (SD)         | 4.9 (3.5)            | 5.1 (3.6)              | 0,843    |
| Coronary heart disease                 | Yes               | 79 (82.3)            | 11 (68.8)              | 0,356    |
|                                        | No                | 17 (17.7)            | 5 (31.2)               |          |
| Chronic heart insufficiency            | Yes               | 77 (80.2)            | 12 (75.0)              | 0,886    |
|                                        | No                | 19 (19.8)            | 4 (25.0)               |          |
| Chronic pulmonary disease              | Yes               | 69 (71.9)            | 10 (62.5)              | 0,642    |
|                                        | No                | 27 (28.1)            | 6 (37.5)               |          |
| Diabetes mellitus without organ damage | Yes               | 87 (90.6)            | 15 (93.8)              | 1        |
|                                        | No                | 9 (9.4)              | 1 (6.2)                |          |
| Diabetes mellitus with organ damage    | Yes               | 90 (93.8)            | 14 (87.5)              | 0,708    |
|                                        | No                | 6 (6.2)              | 2 (12.5)               |          |
| Chronic kidney disease                 | Yes               | 69 (71.9)            | 9 (56.2)               | 0,335    |
|                                        | No                | 27 (28.1)            | 7 (43.8)               |          |
| Chemotherapy                           | Yes               | 89 (92.7)            | 16 (100.0)             | 0,577    |
|                                        | No                | 7 (7.3)              | 0 (0.0)                |          |
| Immunosuppressive therapy              | Yes               | 55 (57.3)            | 6 (37.5)               | 0,23     |
|                                        | No                | 41 (42.7)            | 10 (62.5)              |          |

**Supplemental Figure 1.** In-hospital mortality in hospitalized patients with different SARS-CoV-2 Omicron sublineage infections

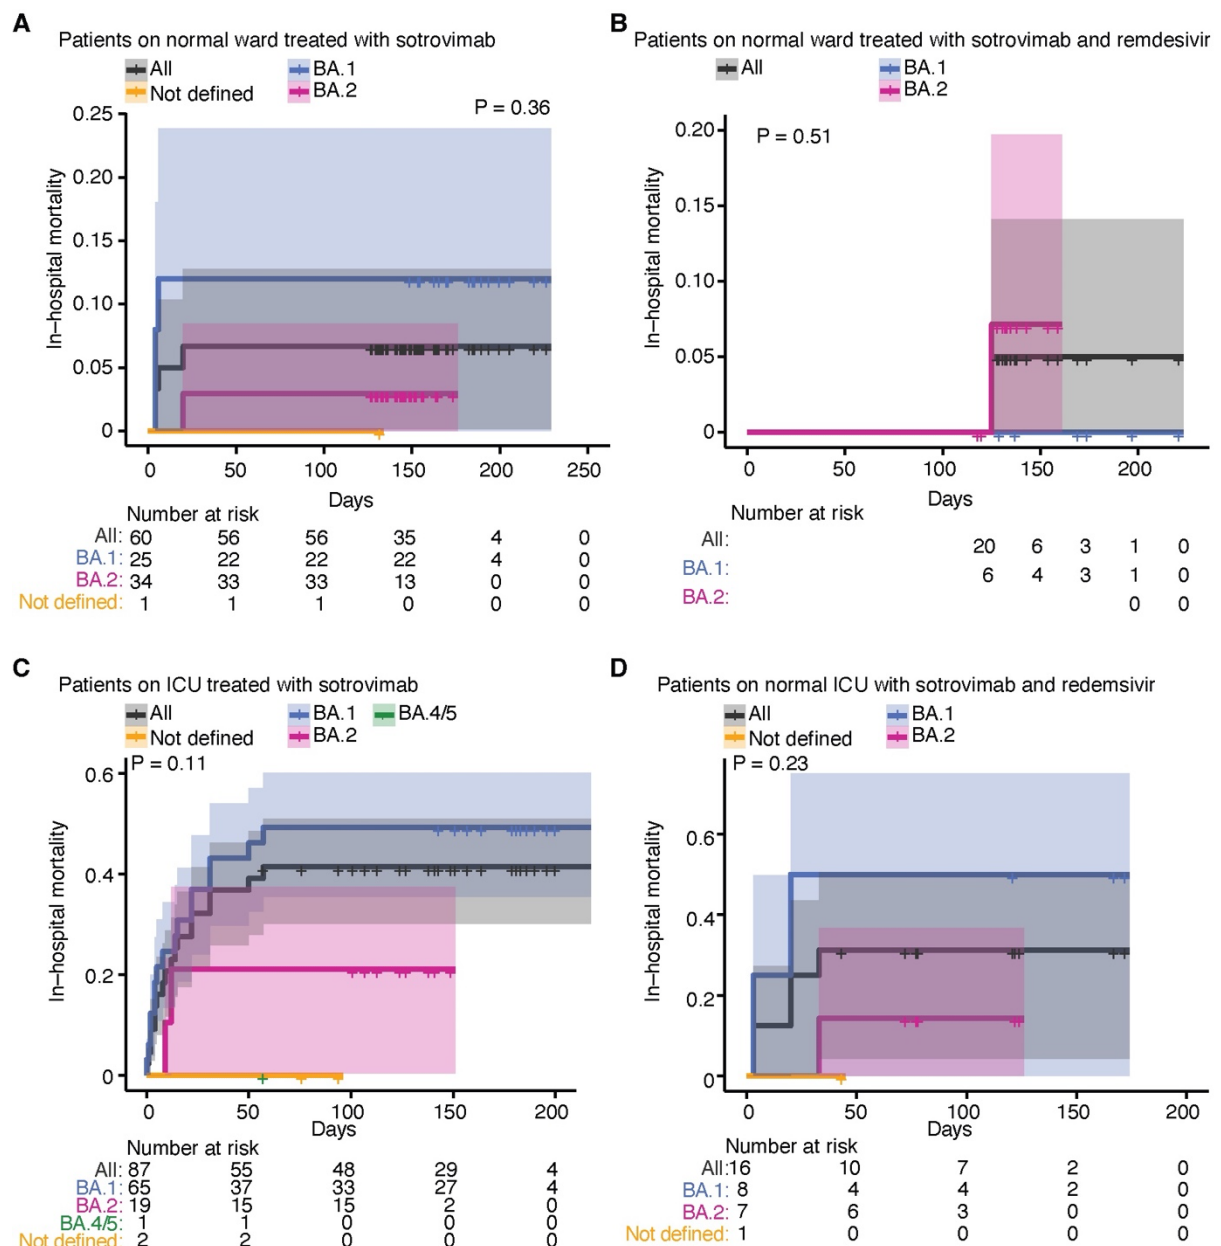

In-hospital mortality is shown for the following treatment groups and compared between SARS-CoV-2 Omicron BA.1, BA.2, and BA.4/5 sublineage infections: patients who were treated with sotrovimab alone in a normal ward (C), patients who were treated with sotrovimab alone in the intensive care unit (D), patients who were treated with combination therapy with sotrovimab and remdesivir in a normal ward (E), and patients who were treated with combination therapy with sotrovimab and remdesivir on the intensive care unit (F). The number at risk refers to the number of patients who were still hospitalized at the respective time after SARS-CoV-2 infection. In a total of four patients, the Omicron sublineage could not be identified.
